# Supplementary material for: Engaging patients in antimicrobial stewardship: co-designed educational tool to improve periprocedural care through de-implementation of guideline-discordant antimicrobial use
Source: PubMed Central journal article supplement (PMC10644164; doi:10.1017/ash.2023.420), 2023-09-28
Supplement: S2732494X23004205sup001.pdf [file S2732494X23004205sup001.pdf]

# KEEPING YOURSELF SAFE:

Preventing Peri-Operative and Peri-Procedural Infections

1.

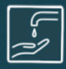

• Follow your provider's instructions for cleaning or washing your skin before the procedure.

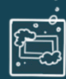

• This might involve special soaps or swabs in your nose.

2.

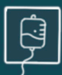

• Antibiotics given before the procedure help prevent infections.

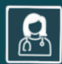

• Your provider will take care of this step - nothing you need to do!

3.

After the procedure:

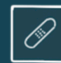

• Keep your incision clean and dry.

• Ask your provider if you have any questions about wound care.

4.

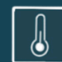

Monitor for signs of infection. These include:

Systemic Symptoms:

• Fever (temp > 100.3F/38C)  
chills or sweats

Wound or Local Symptoms:

• Redness, Drainage, Pus, Pain

# You can help prevent infections!

Your provider will give you antibiotics before your procedure to help prevent infections, but here are some things YOU can do!

## BEFORE THE PROCEDURE

-  Shower beforehand
-  Optimize diabetes control
-  Quit or cutback on smoking
-  Ask your doctor about how to take your medicines before your procedure. Important ones to ask about are: Diabetes medicines, Blood pressure medicines, Blood thinners

## AFTER THE PROCEDURE

-  Keep your wound clean and dry
-  Optimize Diabetes Management
-  Avoid smoking
-  Follow your doctors' recommendations about activity level until after your wound is fully healed

## Remember to watch for these signs of post-procedure infections...

-  Hot Incision
-  Swelling/Hardening
-  Fever (Temp > 100.3F/38C)
-  Redness
-  Pain at Site
-  Drainage
